# Supplementary material
Source: PubMed Central journal article supplement (PMC3298426)
Supplement: NIHMS307864-supplement-SD.pdf [file NIHMS307864-supplement-SD.pdf]

# Supplementary Materials for Article “Seminparametric Stochastic Modeling of the Rate Function in Longitudinal Studies”

Bin Zhu, Jeremy M.G. Taylor and Peter X.-K. Song

This document supplies the technical details related to the proof of Theorem 1, including (a) the derivation of the solution for Ornstein-Uhlenbeck stochastic differential equation (OU SDE) and (b) the derivation of the solution of integrated Ornstein-Uhlenbeck stochastic differential equation (IOU SDE).

## A Solution for OU SDE:

Let  $Z(t) = V(t) - \bar{\nu}$ . We have

$$dZ(t) = dV(t) = -\rho Z(t)dt + \sigma_{\xi}dW(t).$$

Due the fact that for any two continuous functions  $g(t)$  and  $f(t)$ ,

$$\int_{t_1}^{t_2} g(s)df(s) = g(t_2)f(t_2) - g(t_1)f(t_1) - \int_{t_1}^{t_2} f(s)dg(s),$$

we obtain

$$g(t_2)f(t_2) = g(t_1)f(t_1) + \int_{t_1}^{t_2} g(s)df(s) + \int_{t_1}^{t_2} f(s)dg(s).$$

Thus, for  $t_1 = t_{j-1}$ ,  $t_2 = t_j$ ,  $g(s) = Z(s)$  and  $f(s) = \exp(\rho s)$ ,

$$\begin{aligned} Z(t_j) \exp(\rho t_j) &= Z(t_{j-1}) \exp(\rho t_{j-1}) + \int_{t_{j-1}}^{t_j} Z(s) d \exp(\rho s) + \int_{t_{j-1}}^{t_j} \exp(\rho s) dZ(s) \\ &= Z(t_{j-1}) \exp(\rho t_{j-1}) + \int_{t_{j-1}}^{t_j} \exp(\rho s) \{ \rho Z(s) ds + dZ(s) \} \\ &= Z(t_{j-1}) \exp(\rho t_{j-1}) + \int_{t_{j-1}}^{t_j} \exp(\rho s) \sigma_{\xi} dW(s). \end{aligned}$$

It follows that for  $\delta_j = t_j - t_{j-1}$ , we get

$$Z(t_j) = Z(t_{j-1}) \exp(-\rho\delta_j) + \sigma_\xi \zeta_j ,$$

where  $\zeta_j = \exp(-\rho t_j) \int_{t_{j-1}}^{t_j} \exp(\rho s) dW(s)$ . It is easy to show that  $E(\zeta_j) = 0$ , and

$$\begin{aligned} E(\zeta_j^2) &= \exp(-2\rho t_j) E\left[\int_{t_{j-1}}^{t_j} \exp(\rho s_1) dW(s_1) \int_{t_{j-1}}^{t_j} \exp(\rho s_2) dW(s_2)\right] \\ &= \exp(-2\rho t_j) \int_{t_{j-1}}^{t_j} \exp(2\rho s) ds \\ &= \frac{1}{2\rho} \{1 - \exp(-2\rho\delta_j)\}, \end{aligned}$$

and

$$\text{Var}(\zeta_j) = E(\zeta_j^2) = \frac{1}{2\rho} \{1 - \exp(-2\rho\delta_j)\} .$$

Thus,

$$V(t_j) = \bar{v} + \{V(t_{j-1}) - \bar{v}\} \exp(-\rho\delta_j) + \sigma_\xi \zeta_j, \quad (1)$$

with  $E\{V(t_j) | U(t_{j-1}), V(t_{j-1}), \bar{v}, \rho, \sigma_\xi\}$  and  $\text{Var}\{V(t_j) | U(t_{j-1}), V(t_{j-1}), \bar{v}, \rho, \sigma_\xi\}$  equal to the expressions given in Theorem 1.

## B Solution for IOU SDE

From equation (1), we have

$$\begin{aligned} U(t_j) &= U(t_{j-1}) + \int_{t_{j-1}}^{t_j} V(t) dt \\ &= U(t_{j-1}) + \bar{v}\delta_j + \int_{t_{j-1}}^{t_j} \{V(t_{j-1}) - \bar{v}\} \exp\{-\rho(t - t_{j-1})\} dt + \\ &\quad \sigma_\varepsilon \int_{t_{j-1}}^{t_j} \int_{t_{j-1}}^t \exp\{-\rho(t - s)\} dW(s) dt \\ &= U(t_{j-1}) + \bar{v}\delta_j + \{V(t_{j-1}) - \bar{v}\} \left\{ \frac{1 - \exp(-\rho\delta_j)}{\rho} \right\} + \\ &\quad \sigma_\varepsilon \int_{t_{j-1}}^{t_j} \int_{t_{j-1}}^t \exp\{-\rho(t - s)\} dW(s) dt. \end{aligned}$$

This implies that

$$U(t_j) = U(t_{j-1}) + \bar{v}\delta_j + \{V(t_{j-1}) - \bar{v}\} \left\{ \frac{1 - \exp(-\rho\delta_j)}{\rho} \right\} + \sigma_\varepsilon \xi_j,$$

where

$$\begin{aligned}
\xi_j &= \int_{t_{j-1}}^{t_j} \int_{t_{j-1}}^t \exp\{-\rho(t-s)\} dW(s) dt \\
&= \int_{t_{j-1}}^{t_j} \int_s^{t_j} \exp\{-\rho(t-s)\} dt dW(s) \\
&= \frac{1}{\rho} \int_{t_{j-1}}^{t_j} [1 - \exp\{-\rho(t_j-s)\}] dW(s).
\end{aligned}$$

Moreover, we can show that  $E[\xi_j] = 0$ , and

$$\begin{aligned}
Var(\xi_j) = E(\xi_j^2) &= \frac{1}{\rho^2} \int_{t_{j-1}}^{t_j} [\exp\{-2\rho(t_j-s)\} - 2\exp\{-\rho(t_j-s)\} + 1] ds \\
&= \frac{\delta_j}{\rho^2} + \frac{1}{2\rho^3} \{-3 + 4\exp(-\rho\delta_j) - \exp(-2\rho\delta_j)\},
\end{aligned}$$

$$\begin{aligned}
E(\xi_j \zeta_j) &= E \left[ \frac{1}{\rho} \int_{t_{j-1}}^{t_j} [1 - \exp\{-\rho(t_j-s_1)\}] dW(s_1) \int_{t_{j-1}}^{t_j} \exp\{-\rho(t_j-s_2)\} dW(s_2) \right] \\
&= \frac{1}{\rho} \int_{t_{j-1}}^{t_j} [\exp\{-\rho(t_j-s)\} - \exp\{-2\rho(t_j-s)\}] ds \\
&= \frac{1}{2\rho^2} \{1 - 2\exp(-\rho\delta_j) + \exp(-2\rho\delta_j)\}.
\end{aligned}$$

Thus,

$$Cov(\xi_j, \zeta_j) = \frac{1}{2\rho^2} \{1 - 2\exp(-\rho\delta_j) + \exp(-2\rho\delta_j)\}.$$

Finally, it is trivial to show that  $E\{U(t_j) \mid U(t_{j-1}), V(t_{j-1}), \bar{\nu}, \rho, \sigma_\xi\}$ ,  $Var\{U(t_j) \mid U(t_{j-1}), V(t_{j-1}), \bar{\nu}, \rho, \sigma_\xi\}$  and  $Cov\{U(t_j), V(t_j) \mid U(t_{j-1}), V(t_{j-1}), \bar{\nu}, \rho, \sigma_\xi\}$  are the expressions given in Theorem 1.
